# Supplementary material
Source: publisher site journal article supplement (https://www.dovepress.com/article/319630)
Supplement: Supplementary file 1 [file get_supplementary_file.php]

**SUPPLEMENTAL MATERIAL**  
**Diabetes Metabolic Syndrome and Obesity: Targets and Therapy**

Associations of GWAS-supported non-MHC genes with autoimmune thyroiditis in patients  
with type 1 diabetes

**Authors and Affiliations**

Jialin Liang<sup>1\*</sup>, Ganxiong Liang<sup>1</sup>, Zhonghua Liu<sup>2</sup>, Huan Cai<sup>2</sup>

<sup>1</sup> Department of Endocrinology and Metabolism, Zhongshan People's Hospital, Zhongshan 528403, Guangdong, China

<sup>2</sup> Department of Rehabilitation, Zhongshan People's Hospital, Zhongshan 528403, Guangdong, China

**Correspondence to:**

Ganxiong Liang

Department of Endocrinology and Metabolism, Zhongshan People's Hospital, 2 East Sunwen Road, Zhongshan 528403, Guangdong, China

Email: ganxiong\_liang@126.com

Phone: 86-13392926029

Huan Cai

Department of Rehabilitation, Zhongshan People's Hospital, 2 East Sunwen Road, Zhongshan 528403, Guangdong, China.

Email: ch.neurol@gmail.com

Telephone: 86-18718750210

**Supplementary Table 1** Information of the five selected SNPs

| SNP       | Chromosome | Position  | Gene           | Allele | MAF (CHS) | $P^a$ |
|-----------|------------|-----------|----------------|--------|-----------|-------|
| rs1111695 | 1          | 114243899 | <i>PHTF1</i>   | C/A    | 0.133     | 0.636 |
| rs1217407 | 1          | 114393748 | <i>PTPN22</i>  | A/G    | 0.362     | 0.231 |
| rs2153977 | 1          | 114080071 | <i>MAGI3</i>   | T/C    | 0.324     | 0.774 |
| rs2358994 | 1          | 114429461 | <i>BCL2L15</i> | A/G    | 0.357     | 0.452 |
| rs7679475 | 4          | 122314040 | <i>QRFPR</i>   | A/G    | 0.352     | 0.263 |

SNP, single nucleotide polymorphism; MAF, minor allele frequency; CHS, Southern Han Chinese

<sup>a</sup>  $P$  value for Hardy-Weinberg equilibrium

**Supplementary Table 2** Haplotype frequencies of the chromosome 1p13 block in T1D patients with and without AITD

| Haplotype <sup>a</sup>        | Cases with AITD | Controls | OR (95% CI)        | <i>P</i> <sup>b</sup> |
|-------------------------------|-----------------|----------|--------------------|-----------------------|
| rs1111695-rs1217407-rs2153977 |                 |          |                    |                       |
| C-A-T                         | 52.82%          | 56.12%   | 1                  |                       |
| C-G-C                         | 21.12%          | 19.03%   | 1.07 (0.71 - 1.60) | 0.761                 |
| A-G-C                         | 14.41%          | 17.09%   | 0.82 (0.53 - 1.27) | 0.380                 |
| C-G-T                         | 6.87%           | 5.36%    | 1.08 (0.55 - 2.09) | 0.833                 |
| C-A-C                         | 3.47%           | 1.46%    | 2.69 (0.96 - 7.59) | 0.062                 |
| A-G-T                         | 1.32%           | 0.94%    | 0.53 (0.11 - 2.49) | 0.421                 |

T1D, type 1 diabetes; AITD, autoimmune thyroid diseases

<sup>a</sup> Haplotypes were reconstructed by the EM algorithm. Haplotypes with frequencies < 0.01 were excluded

<sup>b</sup> Adjusted for age, sex, BMI, proportion of late-onset T1D, fasting C-peptide, GADA positivity, LDL-C, and HDL-C

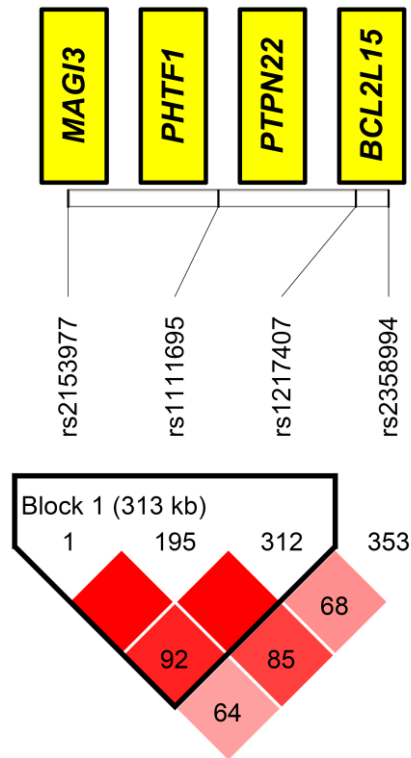

**Supplementary Figure 1** Linkage disequilibrium(LD) plot among the five selected SNPs of non-MHC genes based on the 1000 Genome CHS (Southern Han Chinese) data. The depth of red color represents the magnitude of  $D'$ . Adapted from the Haploview program.
